# Supplementary material for: Vertical profiles of cloud condensation nuclei number concentration and its empirical estimate from aerosol optical properties over the North China Plain
Source: Copernicus journal article supplement (doi:10.5194/egusphere-2022-375), 2022-05-30
Supplement: Supplementary file 1 [file egusphere-2022-375-supplement.pdf]

*Supplement of*

**Vertical profiles of cloud condensation nuclei number concentration  
and its empirical estimate from aerosol optical properties over the  
North China Plain**

Rui Zhang<sup>1</sup>, Yuying Wang<sup>1</sup>, Zhanqing Li<sup>2,3</sup>, Zhibin Wang<sup>4</sup>, Russell R. Dickerson<sup>3</sup>, Xinrong Ren<sup>3</sup>,  
Hao He<sup>3</sup>, Fei Wang<sup>5</sup>, Ying Gao<sup>6</sup>, Xi Chen<sup>1</sup>, Jialu Xu<sup>1</sup>, Yafang Cheng<sup>7</sup>, Hang Su<sup>8</sup>

<sup>1</sup> Key Laboratory for Aerosol-Cloud-Precipitation of China Meteorological Administration, School  
of Atmospheric Physics, Nanjing University of Information Science & Technology, Nanjing  
210044, China

<sup>2</sup> State Key Laboratory of Remote Sensing Science, College of Global Change and Earth System  
Science, Beijing Normal University, Beijing 100875, China

<sup>3</sup> Earth System Science Interdisciplinary Center, Department of Atmospheric and Oceanic Science,  
University of Maryland, College Park, MD, USA

<sup>4</sup> Research Center for Air Pollution and Health, College of Environmental and Resource Science,  
Zhejiang University, Hangzhou 310058, China

<sup>5</sup> Key Laboratory for Cloud Physics, Chinese Academy of Meteorological Sciences, Beijing,  
100081, China

<sup>6</sup> School of Atmospheric Sciences, Nanjing University, Nanjing 210008, China

<sup>7</sup>Minerva Research Group, Max Planck Institute for Chemistry, 55128 Mainz, Germany

<sup>8</sup>Multiphase Chemistry Department, Max Planck Institute for Chemistry, 55128 Mainz, Germany

Correspondence to: Yuying Wang (yuyingwang@nuist.edu.cn)

**Table S1.** The fitting results of Eq. (1) for the 11 level flights

| Flight code | Altitude(km) | $C$   | $k$  | $R^2$ |
|-------------|--------------|-------|------|-------|
| RF1_a       | 3.6          | 156   | 0.18 | 0.59  |
| RF2_a       | 0.4          | 3029  | 1.71 | 0.94  |
| RF2_b       | 3.6          | 2317  | 0.86 | 0.88  |
| RF2_c       | 0.4          | 6560  | 1.75 | 0.92  |
| RF6_a       | 2.5          | 282   | 0.46 | 0.91  |
| RF6_b       | 1.1          | 9981  | 0.79 | 0.83  |
| RF7_a       | 3.1          | 391   | 0.62 | 0.95  |
| RF7_b       | 0.4          | 3218  | 0.65 | 0.73  |
| RF7_c       | 1.8          | 828   | 0.37 | 0.91  |
| RF8_a       | 0.6          | 8120  | 0.89 | 0.91  |
| RF11_a      | 0.7          | 10310 | 0.97 | 0.96  |

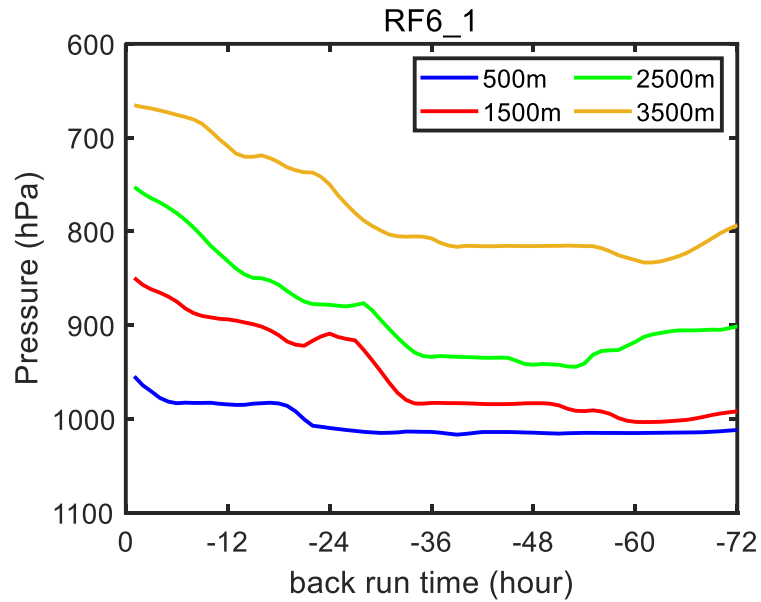**Figure S1.** Seventy-two-hour HYSPLIT back trajectories in southeast air masses at 0.5, 1.5, 2.5, and 3.5 km starting altitudes (showing RF6\_1 as the example).

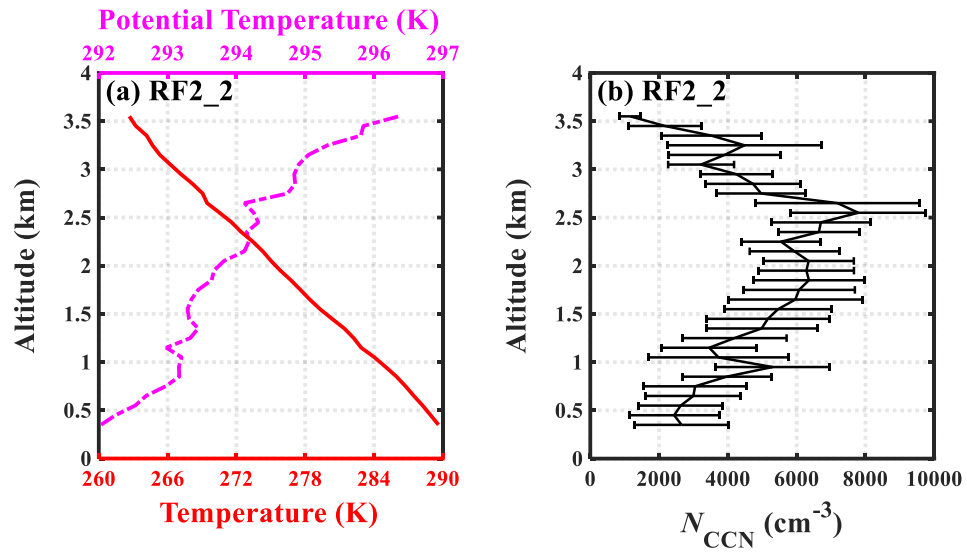

**Figure S2.** Same as Fig.3 but for RF2\_2  $N_{CCN}$  profile with no TIL.

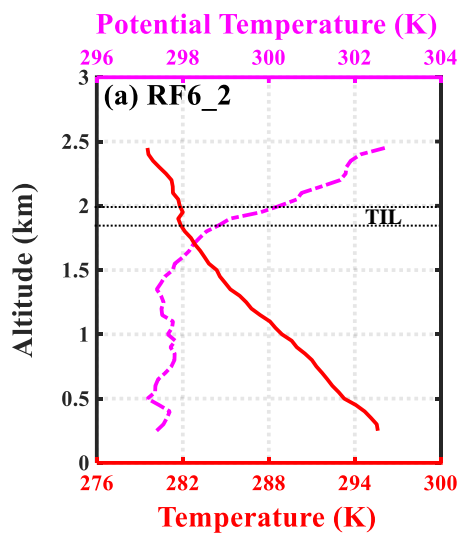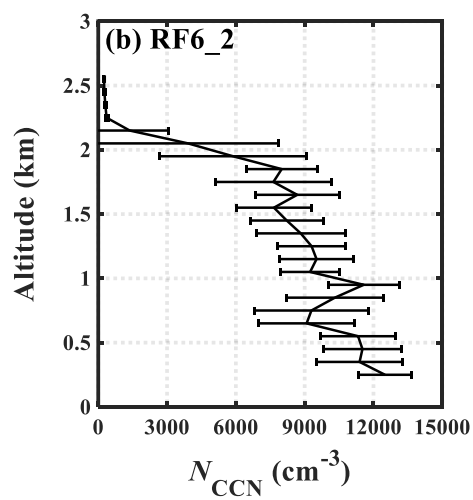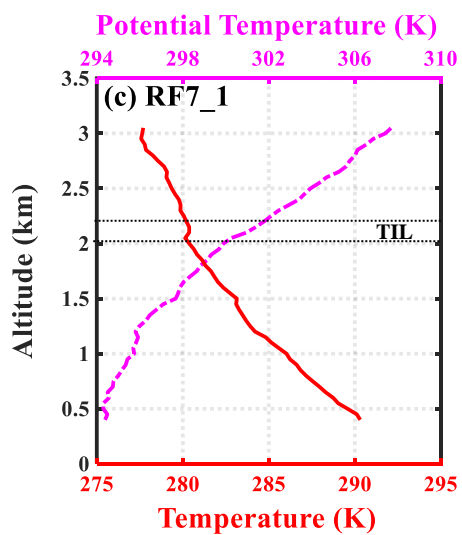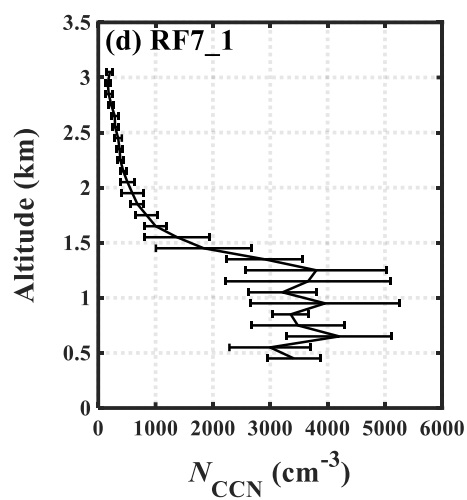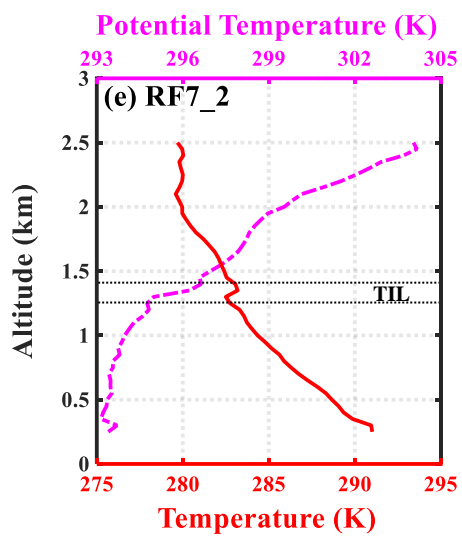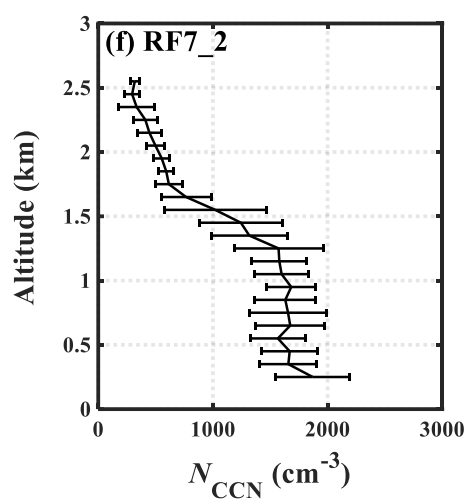

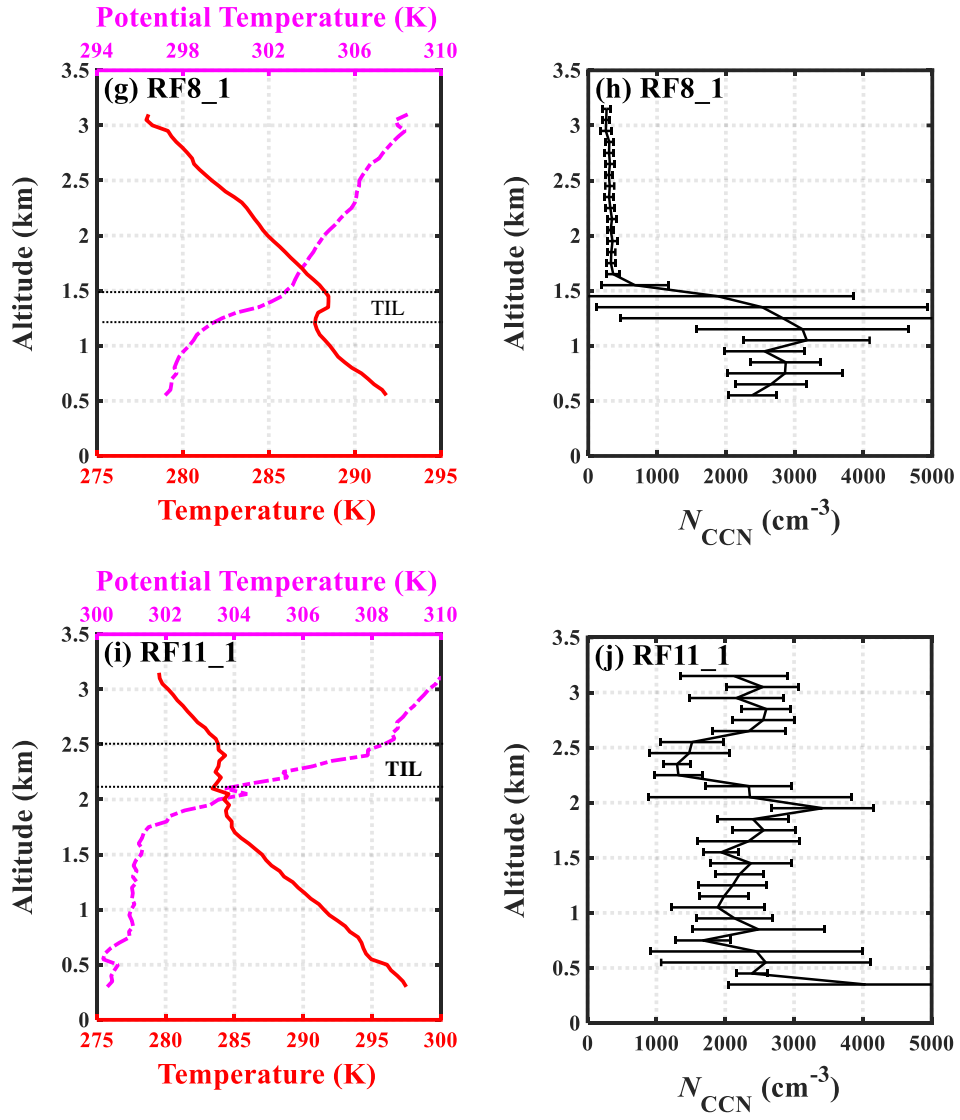

**Figure S3.** Same as Fig.3 but for RF6\_2, RF7\_1, RF7\_2, RF8\_1, and RF11\_1  $N_{\text{CCN}}$  profiles with one TIL.

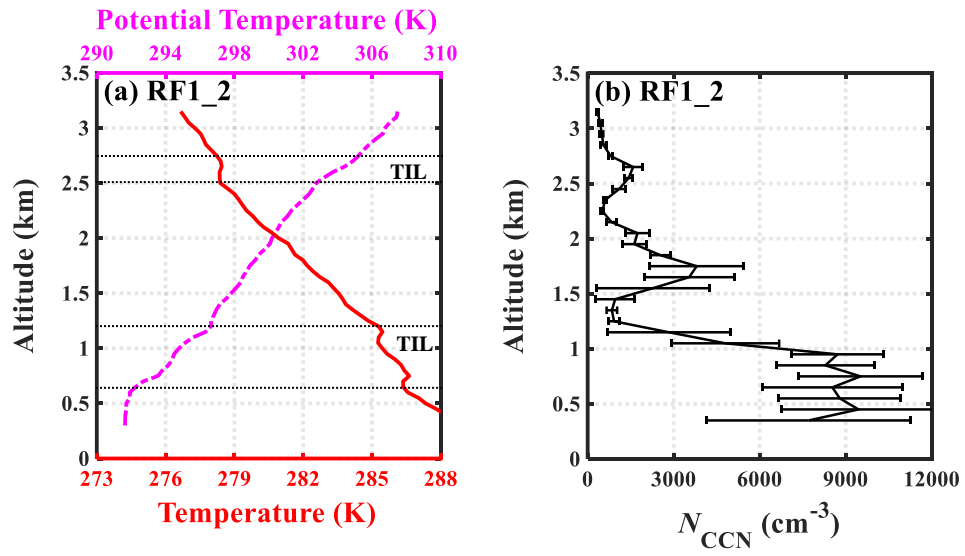

**Figure S4.** Same as Fig.3 but for RF1\_2  $N_{\text{CCN}}$  profiles with dual TIL.

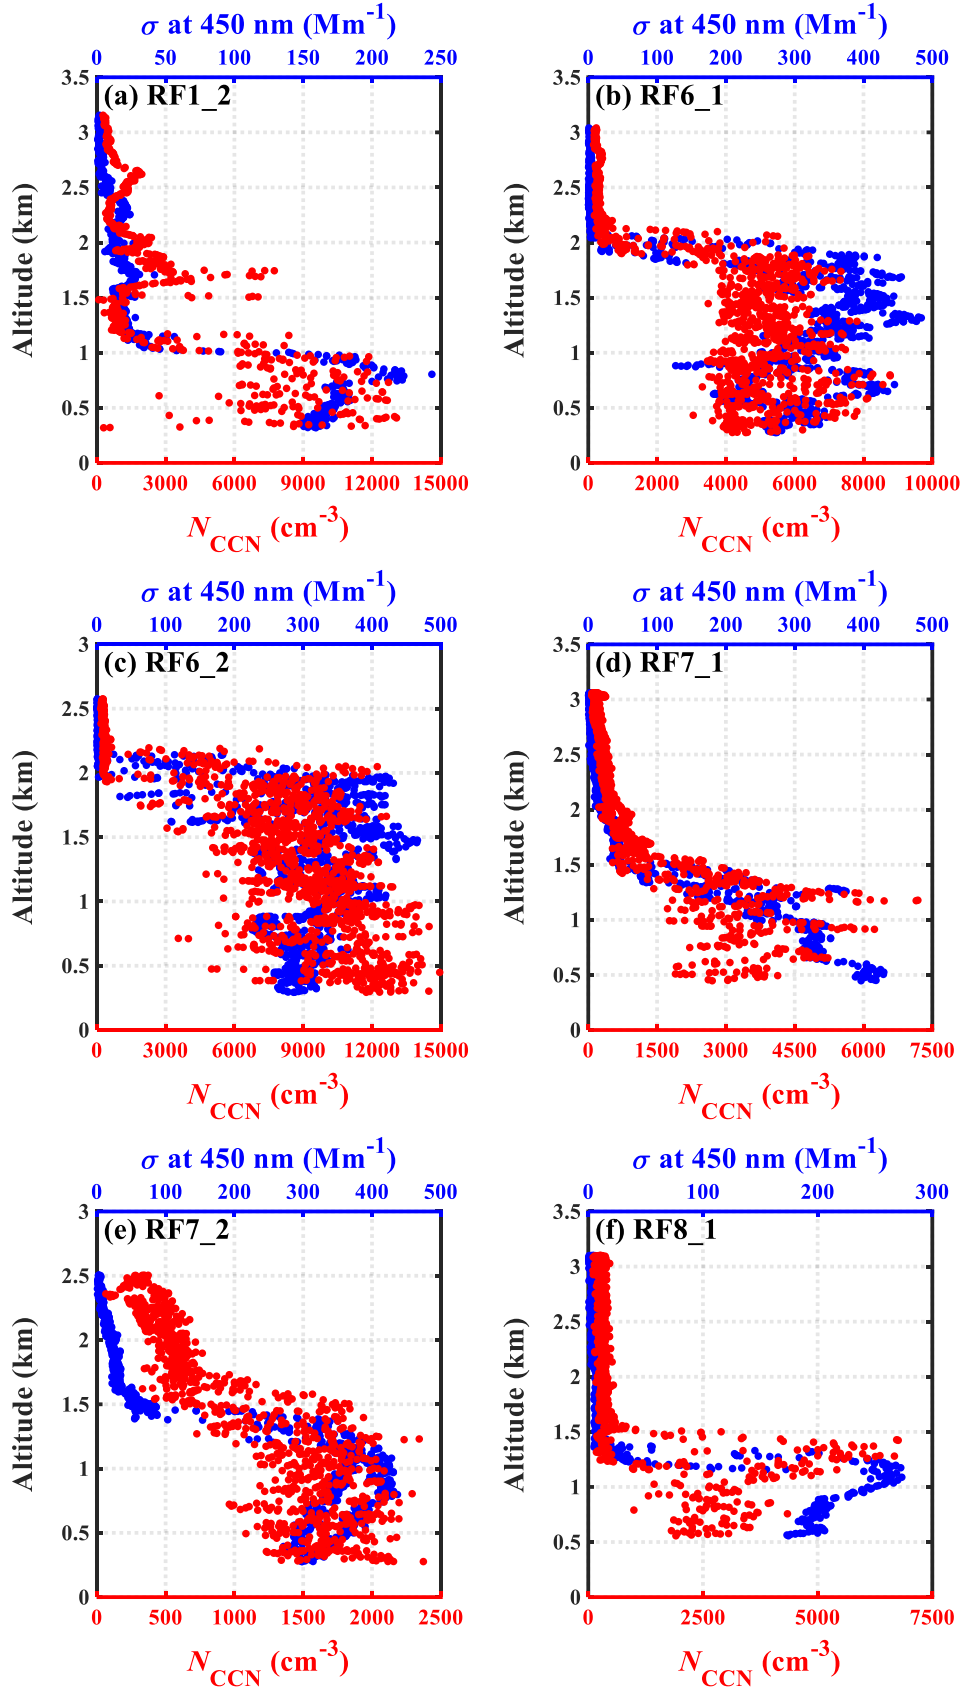

**Figure S5.** Same as Fig. 6b but in (a) RF1\_2, (b) RF6\_1, (c) RF6\_2, (d) RF7\_1, (e) RF7\_2, and (f) RF8\_1 vertical spiral flight.
